# Supplementary material for: Engaging healthcare teams to increase access to medications for opioid use disorder
Source: PubMed Central journal article supplement — Health Serv Res. 2024 Sep 8;59(Suppl 2):e14371. doi: 10.1111/1475-6773.14371 (PMC11540584; doi:10.1111/1475-6773.14371), 2024-09-08
Supplement: HESR-59-0-s001.pdf [file HESR-59-0-s001.pdf]

## APPENDIX A

**TABLE A1** Marginal effects for the facility-level multiple linear regression model with site, time, evidence-based quality improvement (EBQI) implementation status, and duration as explanatory variables ( $n = 8$  sites).

| Site                  | Average marginal effect (AME) |           |              |              |
|-----------------------|-------------------------------|-----------|--------------|--------------|
|                       | Estimate                      | SE        | Lower 95% CI | Upper 95% CI |
| A                     | -0.0195939                    | 0.0160274 | -0.051007    | 0.0118192    |
| B                     | 0.0696954**                   | 0.0160274 | 0.0382823    | 0.1011085    |
| C                     | -0.142208**                   | 0.0138371 | -0.1693283   | -0.1150877   |
| D                     | -0.0105469                    | 0.0137028 | -0.0374039   | 0.0163101    |
| E                     | -0.1568126**                  | 0.0136966 | -0.1836574   | -0.1299678   |
| F                     | -0.0613999**                  | 0.0134098 | -0.0876826   | -0.0351171   |
| G                     | -0.1529118**                  | 0.0133417 | -0.1790611   | -0.1267625   |
| Time                  | 0.0054161**                   | 0.0006522 | 0.0041377    | 0.0066944    |
| Implementation status | 0.0550468**                   | 0.0125457 | 0.0304576    | 0.0796359    |
| Duration              | 0.0014865                     | 0.0014155 | -0.0012879   | 0.0042609    |

Abbreviations: CI, confidence interval; SE, standard error.

\*\* $p < 0.0001$ .
